# Supplementary material for: The proteomic analysis of bovine embryos developed in vivo or in vitro reveals the contribution of the maternal environment to early embryo
Source: Springer Nature journal article supplement (doi:10.1186/s12864-022-09076-5), 2022-12-19

**Figure S1.** Representative pictures of embryos produced *in vivo* (A–E) and *in vitro* (A'–E')

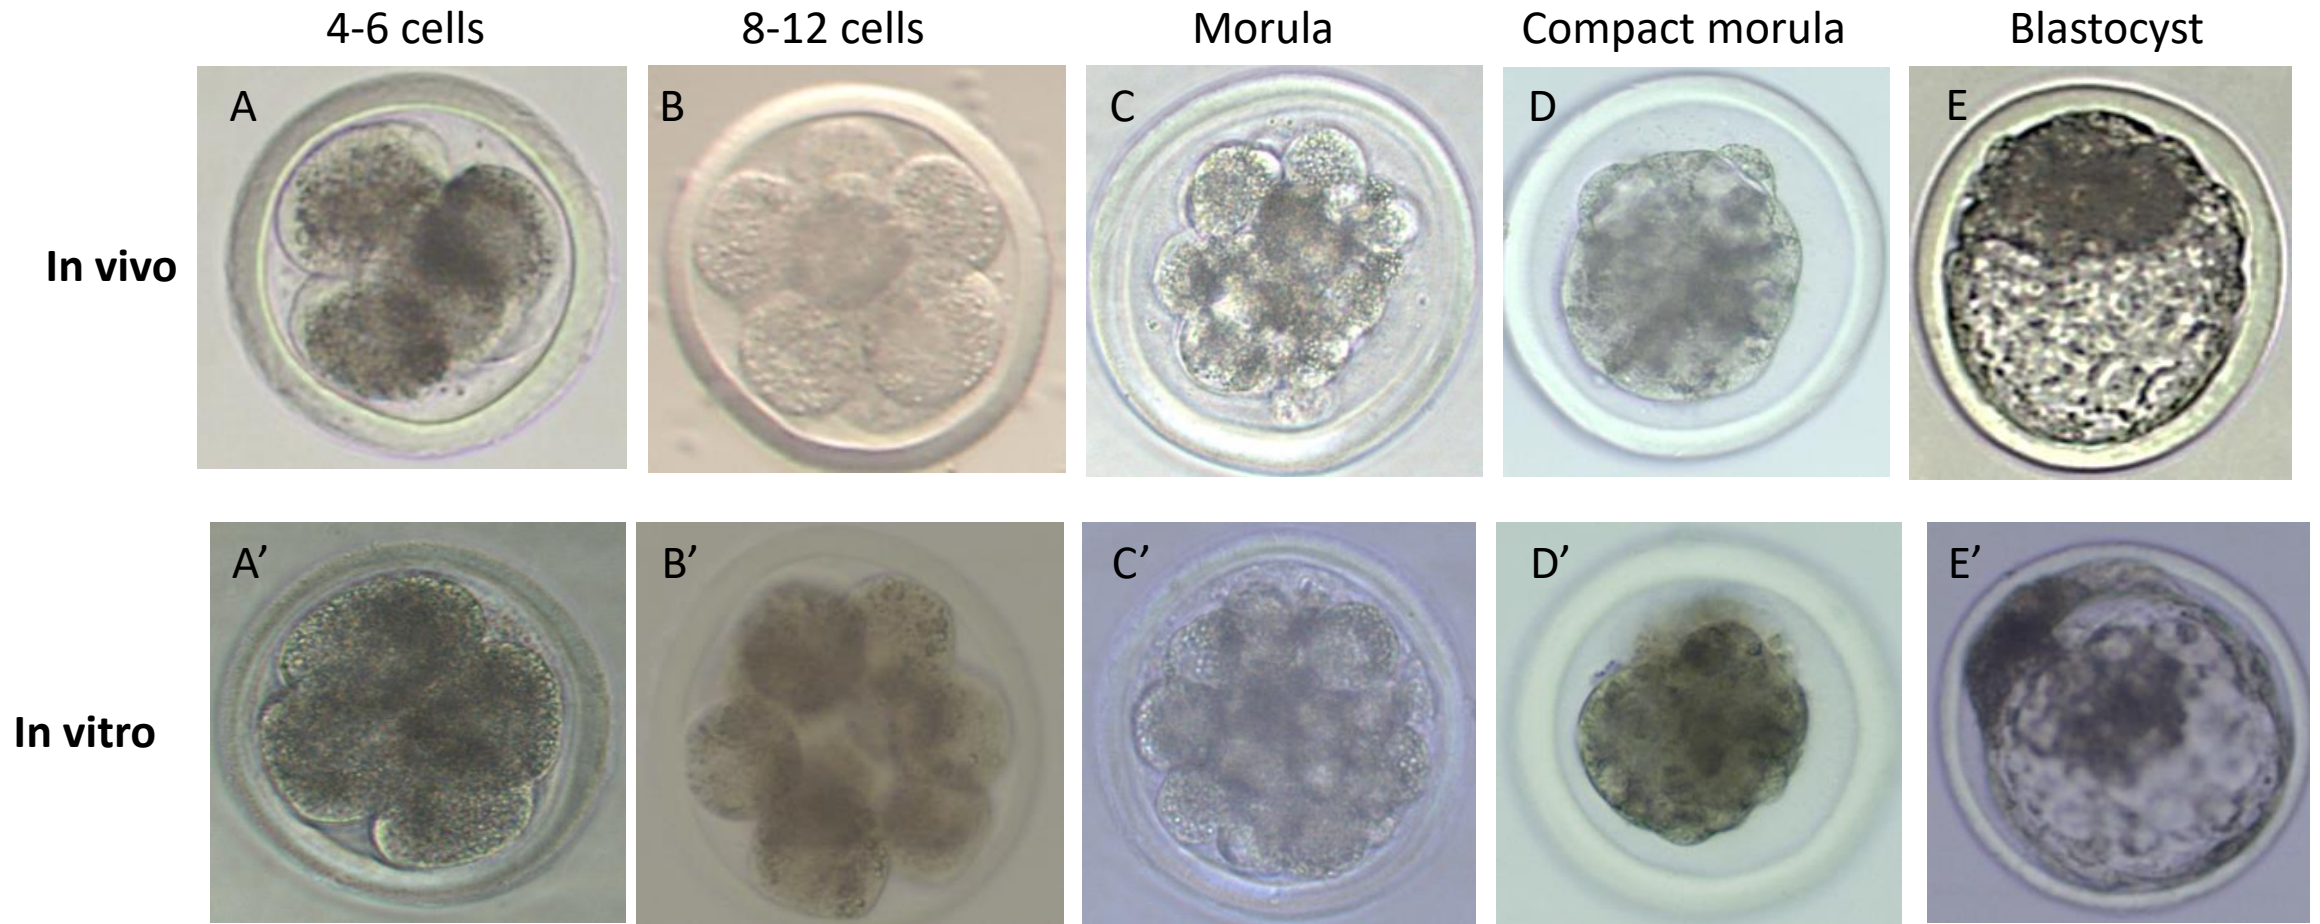

Supplement: MOESM1 [file 12864_2022_9076_MOESM1_ESM.pdf]
